# Supplementary material for: PD-L1 Expression Correlates with Tumor-Infiltrating Lymphocytes and Response to Neoadjuvant Chemotherapy in Breast Cancer
Source: Oxford University Press journal article supplement (doi:10.1158/2326-6066.cir-14-0133), 2014-12-20
Supplement: 23266066cir140133-sup-134680_2_supp_2756331_nfsjs9.docx [file 23266066cir140133-sup-134680_2_supp_2756331_nfsjs9.docx]

Supplemental Table 1. Multivariate analysis of likelihood of pCR on Yale Neoadjuvant Cohort without Ki-67

|  | Multivariate (TIL) | | | Multivariate (Epithelial PD-L1) | | | Multivariate (Stromal PD-L1) | | |
| --- | --- | --- | --- | --- | --- | --- | --- | --- | --- |
| Variable | Odds Ratio* | 95% CI | P-value | Odds Ratio* | 95% CI | P-value | Odds Ratio* | 95% CI | P-value |
| Age (y) |  |  |  |  |  |  |  |  |  |
| <50 | 1 |  |  | 1 |  |  | 1 |  |  |
| ≥50 | 0.590 | 0.151-2.301 | 0.4472 | 0.351 | 0.067-1.849 | 0.2169 | 0.281 | 0.051-1.565 | 0.1474 |
| Nodal Status |  |  |  |  |  |  |  |  |  |
| Negative | 1 |  |  | 1 |  |  | 1 |  |  |
| Positive | 0.107 | 0.026-0.442 | **0.0020** | 0.087 | 0.017-0.438 | **0.0031** | 0.092 | 0.018-0.479 | **0.0045** |
| Tumor Size (cm) |  |  |  |  |  |  |  |  |  |
| <2 | 1 |  |  | 1 |  |  | 1 |  |  |
| >2 | 0.202 | 0.032-1.293 | 0.0913 | 0.133 | 0.016-1.094 | 0.0606 | 0.196 | 0.022-1.747 | 0.1441 |
| Nuclear Grade |  |  |  |  |  |  |  |  |  |
| 1-2 | 1 |  |  | 1 |  |  | 1 |  |  |
| 3 | 3.294 | 0.798-13.597 | 0.0993 | 1.079 | 0.215-5.405 | 0.9267 | 1.149 | 0.237-5.575 | 0.8635 |
| Molecular Category |  |  |  |  |  |  |  |  |  |
| HR+/HER2 - | 1 |  |  | 1 |  |  | 1 |  |  |
| HER2+ | 4.687 | 0.875-25.104 | 0.0712 | 7.121 | 0.861-58.901 | 0.0686 | 7.255 | 0.954-55.181 | 0.0556 |
| Triple Negative | 2.102 | 0.342-12.917 | 0.4227 | 5.811 | 0.953-35.436 | 0.0564 | 7.288 | 1.129-47.033 | **0.0368** |
| LPBC |  |  |  |  |  |  |  |  |  |
| No | 1 |  |  |  |  |  |  |  |  |
| Yes | 28.306 | 1.272-629.80 | **0.0347** |  |  |  |  |  |  |
| Epithelial PD-L1 |  |  |  |  |  |  |  |  |  |
| Low |  |  |  | 1 |  |  |  |  |  |
| High |  |  |  | 7.627 | 1.303-44.660 | **0.0242** |  |  |  |
| Stromal PD-L1 |  |  |  |  |  |  |  |  |  |
| Low |  |  |  |  |  |  | 1 |  |  |
| High |  |  |  |  |  |  | 7.341 | 1.237-43.559 | **0.0282** |

* Odds Ratio indicates likelihood of pCR
